# Supplementary material
Source: PubMed Central journal article supplement (PMC4743933)
Supplement: NIHMS726158-supplement-1.pdf [file NIHMS726158-supplement-1.pdf]

Fig 1

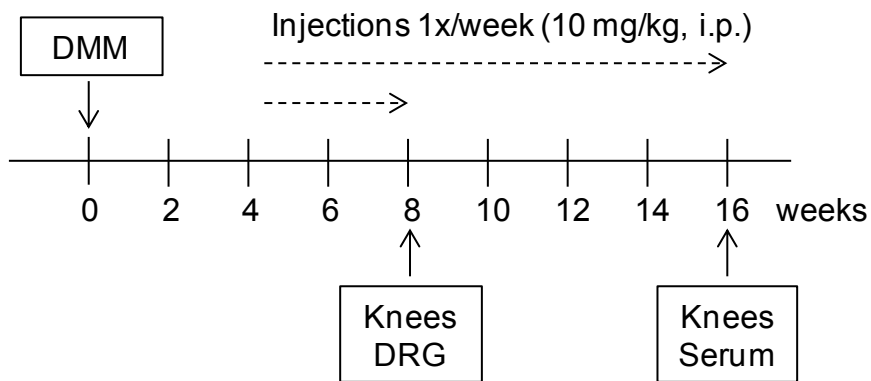

**Figure 1.** Experimental design. Treatment groups: ADAMTS-5 mAb, IgG2c isotype control mAb, or no injection. Mice received injections 1x/week (10 mg/kg, i.p.) beginning at week 4 and continuing to week 8 or 16 after DMM surgery. DRG = dorsal root ganglion.
