# Supplementary material
Source: PubMed Central journal article supplement (PMC4743933)
Supplement: NIHMS726158-supplement-2.pdf [file NIHMS726158-supplement-2.pdf]

# Supp Fig 1

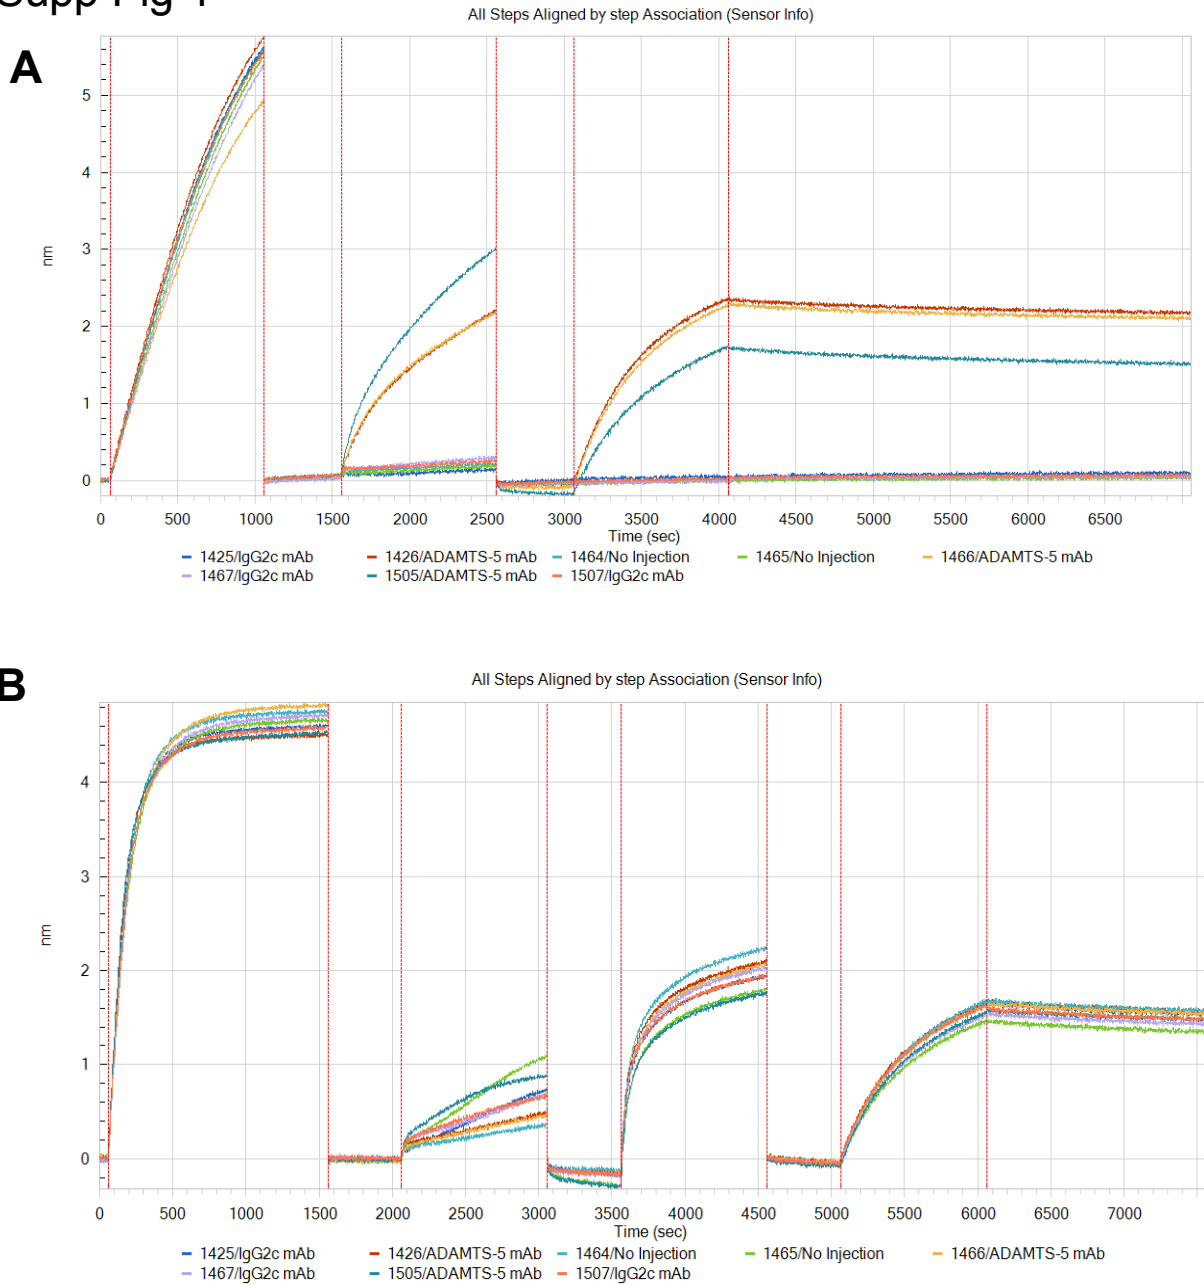

**Supplementary Figure 1.** Sixteen weeks after surgery, serum was collected from a subset of mice (n=2-3/treatment group) in order to test for bioavailability of antibody using two assays on an Octet platform. **A)** Assay 1 - Free drug assessment: Streptavidin-coated sensors were loaded with 5  $\mu\text{g}/\text{mL}$  biotinylated ADAMTS-5 protein, sera was applied (diluted 1:100), followed by a challenge with goat anti-mouse IgG H+L antibody (10  $\mu\text{g}/\text{mL}$ ). **B)** Assay 2 - Immunogenicity/neutralization: Streptavidin-coated sensors were loaded with 10  $\mu\text{g}/\text{mL}$  biotinylated ADAMTS5 mAb (12F4.1H7), sera was applied (diluted 1:100), followed by a challenge with purified human ADAMTS5 (5  $\mu\text{g}/\text{mL}$ ) and a subsequent challenge with goat anti-mouse IgG H+L antibody (10  $\mu\text{g}/\text{mL}$ ). Real-time binding is calculated as relative intensity units (nm shift) using ForteBio Data Analysis Software v8.0.
